# Supplementary material for: Empresarios peculiares y prohibición de competencia desleal (art. 21.1 ET): posibles pautas interpretativas
Source: Royal Society of Chemistry journal article supplement (doi:10.1039/c9cp03645h), 2002-01-01
Supplement: c9cp03645h1.pdf [file c9cp03645h1.pdf]

**Supporting Information:**

**How to Understand Very Weak Cr-Cr Double Bond and Negative Spin Population  
in Trinuclear Cr Complexes : Theoretical Insight**

Masayuki Nakagaki,<sup>a</sup> Naoki Nakatani<sup>b</sup> and Shigeyoshi Sakaki\*<sup>a</sup>

<sup>a</sup> *Fukui Institute for Fundamental Chemistry, Kyoto University, Takano-Nishihiraki-cho, Sakyo-ku, Kyoto 606-8103, Japan. E-mail: sakaki.shigeyoshi.47e@st.kyoto-u.ac.jp*

<sup>b</sup> *Department of Chemistry, Graduate School of Science, Tokyo Metropolitan University, 1-1 Minami-Osawa Hachioji-shi, Tokyo 192-0397, Japan*

Corresponding author: E-mail: sakaki.shigeyoshi.47e@st.kyoto-u.ac.jp

Table S1. DFT-optimized Cr-Cr bond distances (Å) of [Cr<sub>3</sub>(dpa)<sub>4</sub>]Cl<sub>2</sub> **1** and [Cr<sub>3</sub>(dpa)<sub>4</sub>](N<sub>3</sub>)<sub>2</sub> **2** with various functional

| functional | R(Cr <sup>1</sup> -Cr <sup>2</sup> ) / R(Cr <sup>2</sup> -Cr <sup>3</sup> ) [Å] |                                                                              |
|------------|---------------------------------------------------------------------------------|------------------------------------------------------------------------------|
|            | [Cr <sub>3</sub> (dpa) <sub>4</sub> ]Cl <sub>2</sub> <b>1</b>                   | [Cr <sub>3</sub> (dpa) <sub>4</sub> ](N <sub>3</sub> ) <sub>2</sub> <b>2</b> |
| B3PW91     | 2.464 / 2.464                                                                   | 2.461 / 2.461                                                                |
| BLYP       | 2.429 / 2.429                                                                   | 2.426 / 2.426                                                                |
| B3LYP      | 2.479 / 2.479                                                                   | 2.475 / 2.475                                                                |
| M06        | 2.449 / 2.449                                                                   | 2.444 / 2.444                                                                |
| M06L       | 2.394 / 2.394                                                                   | 2.384 / 2.384                                                                |
| PBE0       | 2.468 / 2.468                                                                   | 2.463 / 2.463                                                                |
| exp.       | 2.3647 / 2.3647 <sup>S1</sup>                                                   | 2.131 / 2.534 <sup>S2</sup>                                                  |

Table S2. DFT-optimized bond distance (Å) between metal and ligand of [Cr<sub>3</sub>(dpa)<sub>4</sub>]Cl<sub>2</sub> **1** at experimental Cr-Cr bond distance with various functional.

| functional         | r(Cr <sup>2</sup> -N) | r(Cr <sup>1</sup> -N) | r(Cr <sup>1</sup> -Cl) | RMSE  |
|--------------------|-----------------------|-----------------------|------------------------|-------|
| B3PW91             | 2.048                 | 2.141                 | 2.525                  | 0.022 |
| BLYP               | 2.070                 | 2.156                 | 2.561                  | 0.038 |
| B3LYP              | 2.067                 | 2.159                 | 2.546                  | 0.038 |
| M06                | 2.035                 | 2.137                 | 2.492                  | 0.027 |
| M06L               | 2.035                 | 2.141                 | 2.459                  | 0.041 |
| PBE0               | 2.043                 | 2.138                 | 2.513                  | 0.023 |
| exp. <sup>S1</sup> | 2.023                 | 2.124                 | 2.551                  |       |

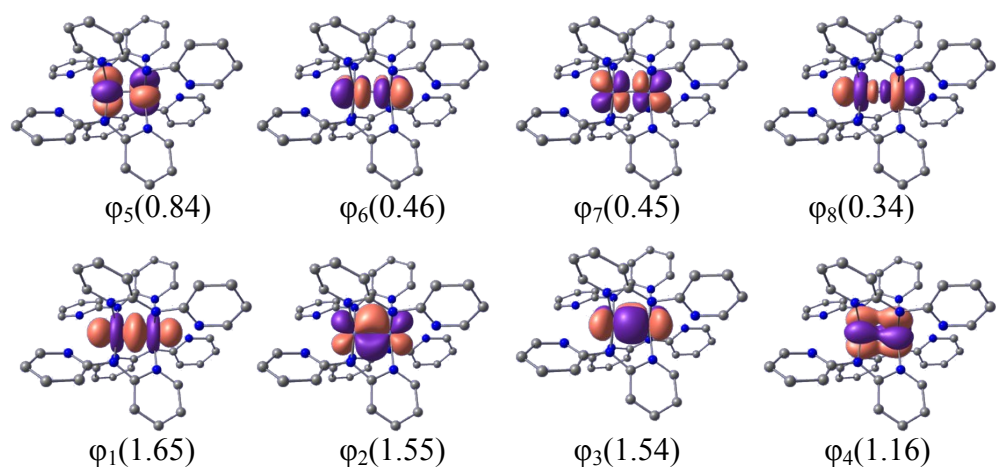

Figure S1. CASSCF natural orbitals of  $\text{Cr}_2(\text{dpa})_4$  with their occupation number.

### **Effective Bond Order (EBO) of trinuclear Cr complex $[\text{Cr}_3(\text{dpa})_4\text{Cl}_2]$ with symmetrical structure 2sym**

In this complex, the occupation numbers of natural orbitals are 1.48, 1.19, 1.19, and 1.04 for  $\sigma$ -type  $\varphi_1$ , one  $\pi$ -type  $\varphi_2$ , the other  $\pi$ -type  $\varphi_3$ , and  $\delta$ -type  $\varphi_4$ , respectively, and 0.96, 0.81, 0.81, and 0.52 for  $\delta^*$ -type  $\varphi_9$ ,  $\pi^*$ -type  $\varphi_{10}$ , the other  $\pi^*$ -type  $\varphi_{11}$ , and  $\delta^*$ -type  $\varphi_{12}$ , respectively, as shown in Figure 3, where the superscript \* represents anti-bonding MO. Because non-bonding d orbital does not participate in Cr-Cr bonding and anti-bonding interactions at all (Figure 3), they are not counted in evaluation of EBO. The difference between the occupation numbers of bonding and antibonding MOs is 0.96, 0.38, 0.38, and 0.05 for  $\sigma$ -type,  $\pi$ -type, the other  $\pi$ -type, and  $\delta$ -type interactions, respectively. The one-half of the sum of them is 0.89, which corresponds to the sum of EBOs of two Cr-Cr bonds. Hence, the EBO of one Cr-Cr bond is 0.44.

This value is much smaller than one, indicating that the Cr-Cr bonding interaction is even weaker than Cr-Cr single bond despite of the fact that this complex has two Cr-Cr double bonds.

This evaluation is the same as that employed for EBO of dinuclear Cr complex but this method cannot be employed for evaluation of EBO of trinuclear Cr complex with nonsymmetrical structure because one Cr-Cr bond is not equivalent to the other Cr-Cr bond.

Table S3. Main configurations of CASSCF and CASCI wavefunctions of (a)  $[\text{Cr}_3(\text{dpa})_4\text{Cl}_2]$  **1sym** and (b)  $[\text{Cr}_3(\text{dpa})_4(\text{N}_3)_2]$  **2asym**.

(a)  $[\text{Cr}_3(\text{dpa})_4\text{Cl}_2]$  **1sym**

| CASSCF with natural orbitals |             |             |             |             |             |             |             |             |                |                |                | Coefficient<br>t |
|------------------------------|-------------|-------------|-------------|-------------|-------------|-------------|-------------|-------------|----------------|----------------|----------------|------------------|
| Configuration                |             |             |             |             |             |             |             |             |                |                |                |                  |
| $\varphi_1$                  | $\varphi_2$ | $\varphi_3$ | $\varphi_4$ | $\varphi_5$ | $\varphi_6$ | $\varphi_7$ | $\varphi_8$ | $\varphi_9$ | $\varphi_{10}$ | $\varphi_{11}$ | $\varphi_{12}$ |                  |
| $\sigma$                     | $\pi$       | $\pi$       | $\delta$    | NB $\delta$ | NB $\pi$    | NB $\pi$    | NB $\sigma$ | $\delta^*$  | $\pi^*$        | $\pi^*$        | $\sigma^*$     |                  |
| 2                            | 2           | 2           | 2           | $\alpha$    | $\alpha$    | $\alpha$    | $\alpha$    | 0           | 0              | 0              | 0              | 0.159            |
| 2                            | 2           | 2           | $\alpha$    | $\alpha$    | $\alpha$    | $\alpha$    | $\alpha$    | $\beta$     | 0              | 0              | 0              | 0.151            |
| 2                            | 2           | 2           | 0           | $\alpha$    | $\alpha$    | $\alpha$    | $\alpha$    | 2           | 0              | 0              | 0              | 0.145            |
| 2                            | $\beta$     | 2           | $\alpha$    | $\alpha$    | $\alpha$    | $\alpha$    | $\alpha$    | $\beta$     | 0              | $\alpha$       | 0              | -0.122           |
| 2                            | 2           | $\beta$     | $\alpha$    | $\alpha$    | $\alpha$    | $\alpha$    | $\alpha$    | $\beta$     | $\alpha$       | 0              | 0              | 0.122            |
| 2                            | $\beta$     | 2           | 2           | $\alpha$    | $\alpha$    | $\alpha$    | $\alpha$    | 0           | $\alpha$       | 0              | 0              | -0.116           |
| 2                            | 2           | $\beta$     | 0           | $\alpha$    | $\alpha$    | $\alpha$    | $\alpha$    | 0           | 0              | $\alpha$       | 0              | 0.116            |

  

| CAS-CI with localized orbitals |          |          |          |                 |         |         |          |                 |          |          |          | Coefficient<br>t |
|--------------------------------|----------|----------|----------|-----------------|---------|---------|----------|-----------------|----------|----------|----------|------------------|
| Configuration                  |          |          |          |                 |         |         |          |                 |          |          |          |                  |
| Cr <sup>1</sup>                |          |          |          | Cr <sup>2</sup> |         |         |          | Cr <sup>3</sup> |          |          |          |                  |
| $\sigma$                       | $\pi$    | $\pi$    | $\delta$ | $\sigma$        | $\pi$   | $\pi$   | $\delta$ | $\sigma$        | $\pi$    | $\pi$    | $\delta$ |                  |
| $\alpha$                       | $\alpha$ | $\alpha$ | $\alpha$ | $\beta$         | $\beta$ | $\beta$ | $\beta$  | $\alpha$        | $\alpha$ | $\alpha$ | $\alpha$ | 0.696            |
| $\alpha$                       | $\alpha$ | $\alpha$ | $\alpha$ | $\alpha$        | $\beta$ | $\beta$ | $\beta$  | $\beta$         | $\alpha$ | $\alpha$ | $\alpha$ | 0.140            |
| $\beta$                        | $\alpha$ | $\alpha$ | $\alpha$ | $\alpha$        | $\beta$ | $\beta$ | $\beta$  | $\alpha$        | $\alpha$ | $\alpha$ | $\alpha$ | 0.140            |
| $\alpha$                       | $\alpha$ | $\alpha$ | $\alpha$ | 2               | $\beta$ | $\beta$ | $\beta$  | 0               | $\alpha$ | $\alpha$ | $\alpha$ | -0.121           |
| 0                              | $\alpha$ | $\alpha$ | $\alpha$ | 2               | $\beta$ | $\beta$ | $\beta$  | $\alpha$        | $\alpha$ | $\alpha$ | $\alpha$ | 0.121            |
| $\alpha$                       | $\alpha$ | $\alpha$ | $\alpha$ | 0               | $\beta$ | $\beta$ | $\beta$  | 2               | $\alpha$ | $\alpha$ | $\alpha$ | -0.107           |
| 2                              | $\alpha$ | $\alpha$ | $\alpha$ | 0               | $\beta$ | $\beta$ | $\beta$  | $\alpha$        | $\alpha$ | $\alpha$ | $\alpha$ | 0.107            |

(b)  $[\text{Cr}_3(\text{dpa})_4(\text{N}_3)_2]$  **2asym**.

| CASSCF with natural orbitals |             |             |             |             |             |             |             |             |                |                |                | Coefficient<br>t |
|------------------------------|-------------|-------------|-------------|-------------|-------------|-------------|-------------|-------------|----------------|----------------|----------------|------------------|
| Configuration                |             |             |             |             |             |             |             |             |                |                |                |                  |
| $\varphi_1$                  | $\varphi_2$ | $\varphi_3$ | $\varphi_4$ | $\varphi_5$ | $\varphi_6$ | $\varphi_7$ | $\varphi_8$ | $\varphi_9$ | $\varphi_{10}$ | $\varphi_{11}$ | $\varphi_{12}$ |                  |
| $\sigma$                     | $\pi$       | $\pi$       | $\delta$    | NB $\delta$ | NB $\pi$    | NB $\pi$    | NB $\sigma$ | $\delta^*$  | $\pi^*$        | $\pi^*$        | $\sigma^*$     |                  |
| 2                            | 2           | 2           | 2           | $\alpha$    | $\alpha$    | $\alpha$    | $\alpha$    | 0           | 0              | 0              | 0              | 0.166            |

|   |         |         |          |          |          |          |          |         |          |          |   |        |
|---|---------|---------|----------|----------|----------|----------|----------|---------|----------|----------|---|--------|
| 2 | 2       | 2       | 0        | $\alpha$ | $\alpha$ | $\alpha$ | $\alpha$ | 2       | 0        | 0        | 0 | 0.150  |
| 2 | $\beta$ | 2       | 2        | $\alpha$ | $\alpha$ | $\alpha$ | $\alpha$ | 0       | $\alpha$ | 0        | 0 | 0.107  |
| 2 | 2       | $\beta$ | 2        | $\alpha$ | $\alpha$ | $\alpha$ | $\alpha$ | 0       | 0        | $\alpha$ | 0 | -0.106 |
| 2 | 2       | 2       | $\alpha$ | $\alpha$ | $\alpha$ | $\alpha$ | $\alpha$ | $\beta$ | 0        | 0        | 0 | 0.103  |
| 2 | 0       | 2       | 2        | $\alpha$ | $\alpha$ | $\alpha$ | $\alpha$ | 0       | 2        | 0        | 0 | -0.101 |
| 2 | 2       | 0       | 2        | $\alpha$ | $\alpha$ | $\alpha$ | $\alpha$ | 0       | 0        | 2        | 0 | -0.101 |

---

CAS-CI with localized orbitals

---

| Configuration   |          |          |          |                 |          |          |          |                 |          |          |          | Coefficient |
|-----------------|----------|----------|----------|-----------------|----------|----------|----------|-----------------|----------|----------|----------|-------------|
| Cr <sup>1</sup> |          |          |          | Cr <sup>2</sup> |          |          |          | Cr <sup>3</sup> |          |          |          |             |
| 1               | 2        | 3        | 4        | 1               | 2        | 3        | 4        | 1               | 2        | 3        | 4        |             |
| $\alpha$        | $\alpha$ | $\alpha$ | $\alpha$ | $\beta$         | $\beta$  | $\beta$  | $\beta$  | $\alpha$        | $\alpha$ | $\alpha$ | $\alpha$ | 0.663       |
| $\beta$         | $\alpha$ | $\alpha$ | $\alpha$ | $\beta$         | $\beta$  | $\alpha$ | $\beta$  | $\alpha$        | $\alpha$ | $\alpha$ | $\alpha$ | 0.122       |
| $\alpha$        | $\beta$  | $\alpha$ | $\alpha$ | $\beta$         | $\alpha$ | $\beta$  | $\beta$  | $\alpha$        | $\alpha$ | $\alpha$ | $\alpha$ | -0.122      |
| $\alpha$        | $\alpha$ | $\beta$  | $\alpha$ | $\alpha$        | $\beta$  | $\beta$  | $\beta$  | $\alpha$        | $\alpha$ | $\alpha$ | $\alpha$ | -0.115      |
| $\beta$         | $\alpha$ | $\alpha$ | $\alpha$ | $\alpha$        | $\beta$  | $\beta$  | $\beta$  | $\alpha$        | $\alpha$ | $\alpha$ | $\alpha$ | -0.112      |
| $\alpha$        | $\beta$  | $\alpha$ | $\alpha$ | $\beta$         | $\beta$  | $\beta$  | $\alpha$ | $\alpha$        | $\alpha$ | $\alpha$ | $\alpha$ | 0.109       |
| $\beta$         | $\alpha$ | $\alpha$ | $\alpha$ | $\beta$         | $\alpha$ | $\beta$  | $\beta$  | $\alpha$        | $\alpha$ | $\alpha$ | $\alpha$ | 0.107       |

### Explanation of Spin Polarization based on CASSCF orbitals:

Spin polarization mechanism cannot be clearly understood on the basis of simple scheme. We wish to present its qualitative explanation based on CASSCF orbitals (Table S3 (a)), using  $\phi_4$ ,  $\phi_5$ , and  $\phi_9$  because these MOs consist of  $d_{yz}$  orbitals of  $\text{Cr}^1$ ,  $\text{Cr}^2$ , and  $\text{Cr}^3$ .

$$\phi_4 = a_1 \chi_1 + a_2 \chi_2 + a_3 \chi_3, \text{ where } a_1 = a_3 \quad (\text{S1})$$

$$\phi_5 = b_1 \chi_1 - b_3 \chi_3, \text{ where } b_1 = b_3 \quad (\text{S2})$$

$$\phi_9 = -c_1 \chi_1 + c_2 \chi_2 + -c_3 \chi_3, \text{ where } c_1 = c_3 \quad (\text{S3})$$

In the above representations,  $a_i$ ,  $b_i$ ,  $c_i$  are LCAO coefficient (we defined they are positive; see Figure 3). The total wave function is represented approximately by eq. S4:

$$\psi = \Phi_1 + \lambda \Phi_2 + \dots \quad (\text{S4})$$

where  $\lambda$  is positive, as shown in Table S3. The main configuration  $\Phi_1$  and the second leading term  $\Phi_2$  are represented by eqs. (S5) and (S6), where the other terms are omitted for brevity:

$$\Phi_1 = |\phi_4 \bar{\phi}_4 \phi_5| \quad (\text{S5})$$

$$\Phi_2 = |\phi_4 \bar{\phi}_9 \phi_5| \quad (\text{S6})$$

In the main configuration, the  $\alpha$ -spin is found on  $\text{Cr}^1$  and  $\text{Cr}^3$ , where their spin densities ( $\rho_s$ ) are approximately  $b_1^2$  and  $b_3^2 (= b_1^2)$ , respectively.

$$\rho_s (\text{Cr}^1) = \rho_s (\text{Cr}^3) = b_1^2 \quad (\text{S7})$$

In the second leading term, the spin density is approximately represented, as follows:

$$\begin{aligned} \rho_s (\text{Cr}^1) &= (1+\lambda)^2 a_1^2 - (a_1 - \lambda c_1)^2 + \lambda^2 b_1^2 \\ &= 2\lambda (a_1^2 + a_1 c_1) + \lambda^2 (a_1^2 - c_1^2 + b_1^2) \end{aligned} \quad (\text{S8a})$$

The LCAO coefficient  $b^1$  is larger than  $a^1$  and  $c^1$  because  $\phi_4$  and  $\phi_9$  are three-center MOs and  $\phi_5$  is two-center MO. The LCAO coefficient  $c^1$  is similar to  $a^1$  but slightly larger than  $a^1$ , because a re-normalization factor is smaller in the anti-bonding MO than in the bonding MO;  $a^1 \leq c^1$ . Thus, eq. S8b is obtained, indicating that the  $\alpha$  spin density increases on the  $\text{Cr}^1$  and  $\text{Cr}^3$ , because  $\lambda$  is positive.

$$\rho_s (\text{Cr}^1) \sim 2\lambda (a_1^2 + a_1 c_1) + \lambda^2 b_1^2 > 0.0 \quad (\text{S8b})$$

The same calculation was performed on the  $\text{Cr}^2$ :

$$\begin{aligned} \rho_s (\text{Cr}^2) &= (1+\lambda)^2 a_2^2 - (a_2 + \lambda c_2)^2 \\ &= 2\lambda (a_2^2 - a_2 c_2) + \lambda^2 (a_2^2 - c_2^2) < 0.0. \end{aligned} \quad (\text{S9})$$

Thus, the negative spin density appears on the  $\text{Cr}^2$  by the second leading term.

Table S4. Main configurations of CASSCF and CASCI wavefunction of (a) allene molecule and (b) allyl radical.

| CASSCF with natural orbitals |             |             |             |                  |                   |             |             |             |
|------------------------------|-------------|-------------|-------------|------------------|-------------------|-------------|-------------|-------------|
| (a) allene molecule          |             |             |             |                  | (b) allyl radical |             |             |             |
| Configuration                |             |             |             | Coefficient<br>t | Configuration     |             |             | coefficient |
| $\varphi_1$                  | $\varphi_2$ | $\varphi_3$ | $\varphi_4$ |                  | $\varphi_1$       | $\varphi_2$ | $\varphi_3$ |             |
| 2                            | 2           | 0           | 0           | 0.917            | 2                 | $\alpha$    | 0           | 0.735       |
| 0                            | 2           | 2           | 0           | -0.265           | $\alpha$          | $\alpha$    | $\beta$     | 0.552       |
| 2                            | 0           | 0           | 2           | -0.265           | $\beta$           | $\alpha$    | $\alpha$    | 0.282       |
| 0                            | 0           | 2           | 2           | 0.080            | $\alpha$          | $\beta$     | $\alpha$    | 0.269       |
|                              |             |             |             |                  | 0                 | $\alpha$    | 2           | -0.053      |

  

| CASCI with localized orbitals |          |          |          |                  |                   |          |          |                  |
|-------------------------------|----------|----------|----------|------------------|-------------------|----------|----------|------------------|
| (a) allene molecule           |          |          |          |                  | (b) allyl radical |          |          |                  |
| Configuration                 |          |          |          | Coefficient<br>t | Configuration     |          |          | Coefficient<br>t |
| Lmo1                          | Lmo2     | Lmo3     | Lmo1     |                  | Lmo1              | Lmo2     | Lmo3     |                  |
| $\alpha$                      | $\beta$  | $\beta$  | $\alpha$ | 0.401            | $\alpha$          | $\beta$  | $\alpha$ | 0.708            |
| $\beta$                       | $\alpha$ | $\alpha$ | $\beta$  | 0.401            | $\beta$           | $\alpha$ | $\alpha$ | -0.354           |
| $\beta$                       | $\alpha$ | $\beta$  | $\alpha$ | 0.362            | $\alpha$          | $\alpha$ | $\beta$  | 0.354            |
| $\alpha$                      | $\beta$  | $\alpha$ | $\beta$  | 0.362            |                   |          |          |                  |



### Formal shortness ratio (FSR) and orbital shortness ratio (OSR)

The FSR for an A-B bond is defined by eq. S11

$$\text{FSR}_{\text{AB}} = R_{\text{A-B}} / (R_{\text{A}} + R_{\text{B}}) \quad (\text{S11})$$

where  $R_{\text{A-B}}$  is the A-B bond length in a molecule and  $R_{\text{A}}$  and  $R_{\text{B}}$  are the atomic radii of A and B, respectively. For example,  $\text{FSR}_{\text{N-N}}$  of dinitrogen molecule is evaluated to be 0.783 using  $R_{\text{N}} = 0.70$ .  $\text{FSR}_{\text{Cr-Cr}}$  for several Cr quadruple bonds was evaluated previously to be 0.74 to 0.78, which is similar to that of dinitrogen molecule. Using  $R_{\text{Cr}} = 1.186$  which was employed in the previous theoretical study of Cr dinuclear complex,<sup>S3</sup> the FSR is evaluated to be 1.012 for **1sym** and 0.957 and 1.059 for shorter and longer Cr-Cr bonds, respectively, for **2asym**.

Because the bond distance depends on the orbital expansion, the bond distance must be discussed on the basis of orbital overlap. For this reason, OSR was proposed by Kurokawa *et al.*<sup>S3</sup>

$$\text{OSR} = R_{\text{M-M}} / R_{\text{Smax}}^{\sigma} \quad (\text{S12})$$

where distance  $R_{\text{Smax}}^{\sigma}$  is providing the maximum overlap integral for  $\sigma$ - $\sigma$  bond because the  $\sigma$ -bonding interaction is always more important than the  $\pi$ -bonding interaction.

The OSR of dinitrogen molecule is 0.752, which is similar to the FSR value.  $R_{\text{Smax}}^{\sigma}$  was evaluated to be 1.520 Å for  $\sigma$ - $\sigma$  interaction of Cr 3d orbitals.

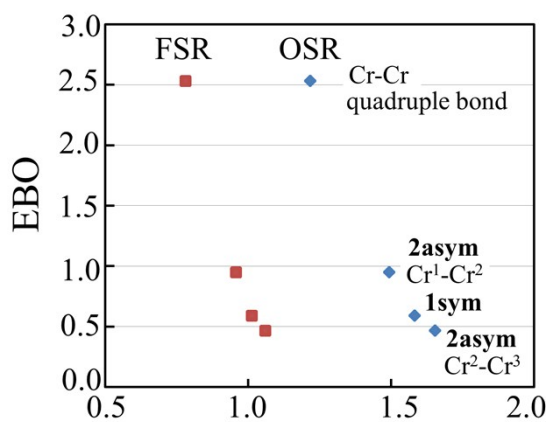

Figure S2. Relationships of EBO with FSR and OSR.

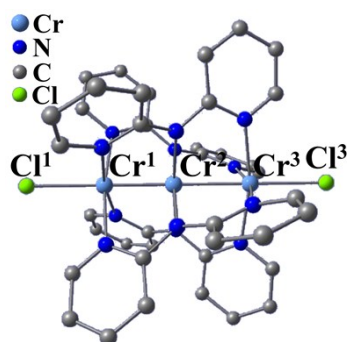

$$\text{Cr}^1\text{-Cr}^2 = 2.269 \text{ \AA}, \text{Cr}^2\text{-Cr}^3 = 2.512 \text{ \AA}$$

$$\text{Cr}^1\text{-Cl}^1 = 2.530 \text{ \AA}, \text{Cr}^3\text{-Cl}^3 = 2.510 \text{ \AA}$$

Figure S3. Optimized structure of (a)  $[\text{Cr}_3(\text{dpa})_4\text{Cl}_2]$  **1asym** with non-symmetrical structure. Two Cr-Cr bond distances are fixed to those of  $[\text{Cr}_3(\text{dpa})_4(\text{N}_3)_2]$  **2asym** with asymmetrical structures. The Cr<sup>1</sup>-Cl<sup>1</sup> distance was 0.015 Å elongated but the Cr<sup>3</sup>-Cl<sup>3</sup> one was shortened only 0.005 Å from symmetrical structure to asymmetrical one.



### **Complete reference 75**

Frisch, M. J.; Trucks, G. W.; Schlegel, H. B.; Scuseria, G. E.; Robb, M. A.; Cheeseman, J. R.; Scalmani, G.; Barone, V.; Mennucci, B.; Petersson, G. A.; Nakatsuji, H.; Caricato, M.; Li, X.; Hratchian, H. P.; Izmaylov, A. F.; Bloino, J.; Zheng, G.; Sonnenberg, J. L.; Hada, M.; Ehara, M.; Toyota, K.; Fukuda, R.; Hasegawa, J.; Ishida, M.; Nakajima, T.; Honda, Y.; Kitao, O.; Nakai, H.; Vreven, T.; Montgomery, Jr. J. A.; Peralta, J. E.; Ogliaro, F.; Bearpark, M.; Heyd, J. J.; Brothers, E.; Kudin, K. N.; Staroverov, V. N.; Keith, T.; Kobayashi, R.; Normand, J.; Raghavachari, K.; Rendell, A.; Burant, J. C.; Iyengar, S. S.; Tomasi, J.; Cossi, M.; Rega, N.; Millam, J. M.; Klene, M.; Knox, J. E.; Cross, J. B.; Bakken, V.; Adamo, C.; Jaramillo, J.; Gomperts, R.; Stratmann, R. E.; Yazyev, O.; Austin, A. J.; Cammi, R.; Pomelli, C.; Ochterski, J. W.; Martin, R. L.; Morokuma, K.; Zakrzewski, V. G.; Voth, G. A.; Salvador, P.; Dannenberg, J. J.; Dapprich, S.; Daniels, A. D.; Farkas, O.; Foresman, J. B.; Ortiz, J. V.; Cioslowski, J.; Fox, D. J. Gaussian 09, revision D.01; Gaussian, Inc.: Wallingford, CT,

## References.

- S1. F. A. Cotton, L.M. Daniels, C.A. Murillo, I. Pascual, *J. Am. Chem. Soc.* 1997, **119**, 10223.
- S2. Y. Turov, J. F. Berry, *Dalton Trans.*, 2012, **41**, 8153.
- S3. Y. I. Kurokawa, Y. Nakao, and S. Sakaki, *J. Phys. Chem. A*, 2009, **113**, 3202.

**# Cartesian coordinate of optimized structures**

**# DMRG-CASPT2 results**

**# 1**

|    |              |              |              |
|----|--------------|--------------|--------------|
| Cr | 0.000000000  | 0.000000000  | 0.000187001  |
| Cr | 0.000000000  | 0.000000000  | 2.405187173  |
| Cr | 0.000000000  | 0.000000000  | -2.404813172 |
| N  | 0.000000000  | -2.045487145 | -0.000010001 |
| N  | 0.000000000  | 2.045487145  | -0.000010001 |
| N  | -0.757710054 | -1.994112142 | 2.186973155  |
| N  | 0.757710054  | 1.994112142  | 2.186973155  |
| N  | 0.757481057  | -1.994219141 | -2.187083155 |
| N  | -0.757481057 | 1.994219141  | -2.187083155 |
| N  | -2.045487145 | 0.000000000  | -0.000010001 |
| N  | 2.045487145  | 0.000000000  | -0.000010001 |
| N  | -1.994112142 | 0.757710054  | 2.186973155  |
| N  | 1.994112142  | -0.757710054 | 2.186973155  |
| N  | -1.994219141 | -0.757481057 | -2.187083155 |
| N  | 1.994219141  | 0.757481057  | -2.187083155 |
| C  | -1.426496103 | -2.542309185 | 3.222379231  |
| C  | 1.426496103  | 2.542309185  | 3.222379231  |
| C  | -2.003587145 | -3.800116271 | 3.179941232  |
| C  | 2.003587145  | 3.800116271  | 3.179941232  |
| C  | -1.907355135 | -4.521589325 | 1.984060145  |
| C  | 1.907355135  | 4.521589325  | 1.984060145  |
| C  | -1.231909087 | -3.974907284 | 0.909167065  |
| C  | 1.231909087  | 3.974907284  | 0.909167065  |
| C  | -0.634128047 | -2.695569193 | 1.022782076  |
| C  | 0.634128047  | 2.695569193  | 1.022782076  |
| C  | 0.633969045  | -2.695645193 | -1.022860072 |
| C  | -0.633969045 | 2.695645193  | -1.022860072 |
| C  | 1.231702089  | -3.975010288 | -0.909259067 |
| C  | -1.231702089 | 3.975010288  | -0.909259067 |
| C  | 1.907086138  | -4.521730324 | -1.984177140 |
| C  | -1.907086138 | 4.521730324  | -1.984177140 |
| C  | 2.003245143  | -3.800287274 | -3.180078231 |
| C  | -2.003245143 | 3.800287274  | -3.180078231 |

|   |              |              |              |
|---|--------------|--------------|--------------|
| C | 1.426146100  | -2.542474183 | -3.222530232 |
| C | -1.426146100 | 2.542474183  | -3.222530232 |
| C | -2.542309185 | 1.426496103  | 3.222379231  |
| C | 2.542309185  | -1.426496103 | 3.222379231  |
| C | -3.800116271 | 2.003587145  | 3.179941232  |
| C | 3.800116271  | -2.003587145 | 3.179941232  |
| C | -4.521589325 | 1.907355135  | 1.984060145  |
| C | 4.521589325  | -1.907355135 | 1.984060145  |
| C | -3.974907284 | 1.231909087  | 0.909167065  |
| C | 3.974907284  | -1.231909087 | 0.909167065  |
| C | -2.695569193 | 0.634128047  | 1.022782076  |
| C | 2.695569193  | -0.634128047 | 1.022782076  |
| C | -2.695645193 | -0.633969045 | -1.022860072 |
| C | 2.695645193  | 0.633969045  | -1.022860072 |
| C | -3.975010288 | -1.231702089 | -0.909259067 |
| C | 3.975010288  | 1.231702089  | -0.909259067 |
| C | -4.521730324 | -1.907086138 | -1.984177140 |
| C | 4.521730324  | 1.907086138  | -1.984177140 |
| C | -3.800287274 | -2.003245143 | -3.180078231 |
| C | 3.800287274  | 2.003245143  | -3.180078231 |
| C | -2.542474183 | -1.426146100 | -3.222530232 |
| C | 2.542474183  | 1.426146100  | -3.222530232 |
| H | -1.462511107 | -1.921055137 | 4.120763298  |
| H | 1.462511107  | 1.921055137  | 4.120763298  |
| H | -2.521458183 | -4.193872304 | 4.054377292  |
| H | 2.521458183  | 4.193872304  | 4.054377292  |
| H | -2.377274174 | -5.503594399 | 1.886630136  |
| H | 2.377274174  | 5.503594399  | 1.886630136  |
| H | -1.186935086 | -4.500289326 | -0.044163001 |
| H | 1.186935086  | 4.500289326  | -0.044163001 |
| H | 1.186772083  | -4.500356326 | 0.044095001  |
| H | -1.186772083 | 4.500356326  | 0.044095001  |
| H | 2.377014173  | -5.503731397 | -1.886748137 |
| H | -2.377014173 | 5.503731397  | -1.886748137 |
| H | 2.521020183  | -4.194085303 | -4.054553291 |
| H | -2.521020183 | 4.194085303  | -4.054553291 |

|            |              |              |              |
|------------|--------------|--------------|--------------|
| H          | 1.462098106  | -1.921241138 | -4.120929295 |
| H          | -1.462098106 | 1.921241138  | -4.120929295 |
| H          | -1.921055137 | 1.462511107  | 4.120763298  |
| H          | 1.921055137  | -1.462511107 | 4.120763298  |
| H          | -4.193872304 | 2.521458183  | 4.054377292  |
| H          | 4.193872304  | -2.521458183 | 4.054377292  |
| H          | -5.503594399 | 2.377274174  | 1.886630136  |
| H          | 5.503594399  | -2.377274174 | 1.886630136  |
| H          | -4.500289326 | 1.186935086  | -0.044163001 |
| H          | 4.500289326  | -1.186935086 | -0.044163001 |
| H          | -4.500356326 | -1.186772083 | 0.044095001  |
| H          | 4.500356326  | 1.186772083  | 0.044095001  |
| H          | -5.503731397 | -2.377014173 | -1.886748137 |
| H          | 5.503731397  | 2.377014173  | -1.886748137 |
| H          | -4.194085303 | -2.521020183 | -4.054553291 |
| H          | 4.194085303  | 2.521020183  | -4.054553291 |
| H          | -1.921241138 | -1.462098106 | -4.120929295 |
| H          | 1.921241138  | 1.462098106  | -4.120929295 |
| Cl         | 0.000000000  | 0.000000000  | 4.920432355  |
| Cl         | 0.000000000  | 0.000000000  | -4.920093353 |
| #          |              |              |              |
| <b># 2</b> |              |              |              |
| Cr         | 0.000000000  | 0.000000000  | 2.271000163  |
| Cr         | 0.000000000  | 0.000000000  | 0.000000000  |
| Cr         | 0.000000000  | 0.000000000  | -2.514000181 |
| N          | 0.773522055  | 1.985442144  | 2.100082151  |
| N          | 0.030335001  | 2.049213146  | -0.083276005 |
| N          | -0.728059051 | 1.992087144  | -2.273566165 |
| N          | 1.988432144  | -0.771970057 | 2.100142149  |
| N          | 2.047921149  | -0.030993001 | -0.083684005 |
| N          | 1.997981142  | 0.735390056  | -2.272105164 |
| N          | -0.791329060 | -1.981140145 | 2.102889150  |
| N          | -0.014953999 | -2.048166148 | -0.068151007 |
| N          | 0.718877053  | -2.005322142 | -2.268194164 |
| N          | -1.976035140 | 0.782278055  | 2.104949152  |
| N          | -2.049310149 | 0.016415999  | -0.069143003 |



|   |              |              |              |
|---|--------------|--------------|--------------|
| N | -2.001690145 | -0.720689051 | -2.268366162 |
| C | 1.431593101  | 2.517455180  | 3.149269230  |
| C | 2.018670146  | 3.771363271  | 3.123222226  |
| C | 1.942866141  | 4.501865322  | 1.930833137  |
| C | 1.274757093  | 3.971049285  | 0.842854059  |
| C | 0.664645048  | 2.696522194  | 0.941243069  |
| C | -0.589804044 | 2.699596195  | -1.113990082 |
| C | -1.163930084 | 3.991535287  | -1.014079074 |
| C | -1.828359132 | 4.542279329  | -2.093525152 |
| C | -1.944289140 | 3.811392276  | -3.282327235 |
| C | -1.392932099 | 2.542547183  | -3.309490236 |
| C | 2.525254183  | -1.425701104 | 3.149214227  |
| C | 3.776744274  | -2.017576147 | 3.119491225  |
| C | 4.501208322  | -1.949393140 | 1.922999139  |
| C | 3.967537284  | -1.282171094 | 0.835895061  |
| C | 2.695681193  | -0.667299046 | 0.938938069  |
| C | 2.700730195  | 0.593722041  | -1.110047082 |
| C | 3.992207289  | 1.166914082  | -0.999082074 |
| C | 4.550252327  | 1.835833131  | -2.071548151 |
| C | 3.825828273  | 1.955490140  | -3.263578236 |
| C | 2.556999183  | 1.404098099  | -3.301718236 |
| C | -1.474756105 | -2.515713181 | 3.134971225  |
| C | -2.044470146 | -3.776897269 | 3.105441225  |
| C | -1.925346140 | -4.517600323 | 1.922964139  |
| C | -1.240055089 | -3.984081286 | 0.848138063  |
| C | -0.651986048 | -2.698867195 | 0.950112070  |
| C | 0.610400046  | -2.697920195 | -1.098103081 |
| C | 1.210576085  | -3.976191285 | -0.984678070 |
| C | 1.863625134  | -4.534603328 | -2.067670150 |
| C | 1.934395140  | -3.826007273 | -3.272994236 |
| C | 1.360870096  | -2.566475186 | -3.312757238 |
| C | -2.503443180 | 1.459216106  | 3.144112228  |
| C | -3.765121271 | 2.027624148  | 3.126277224  |
| C | -4.511372325 | 1.913953139  | 1.946463138  |
| C | -3.984007286 | 1.235544091  | 0.863768065  |
| C | -2.698150197 | 0.647233047  | 0.954260068  |

|   |              |              |              |
|---|--------------|--------------|--------------|
| C | -2.698185197 | -0.607853042 | -1.100637077 |
| C | -3.978623288 | -1.204113084 | -0.991551072 |
| C | -4.533507328 | -1.859181135 | -2.075186150 |
| C | -3.818813272 | -1.937740138 | -3.276445239 |
| C | -2.557414185 | -1.367897099 | -3.313009237 |
| H | 1.449860104  | 1.881793133  | 4.038511288  |
| H | 2.530065182  | 4.155859301  | 4.005585287  |
| H | 2.422686176  | 5.480290396  | 1.846993135  |
| H | 1.245342088  | 4.505477322  | -0.106022006 |
| H | -1.110855082 | 4.525096325  | -0.065764005 |
| H | -2.277441166 | 5.534668401  | -2.004966144 |
| H | -2.457032176 | 4.205596300  | -4.159283300 |
| H | -1.468757103 | 1.910181137  | -4.196094304 |
| H | 1.896504139  | -1.432402102 | 4.042813293  |
| H | 4.164225297  | -2.525586184 | 4.002481287  |
| H | 5.477363395  | -2.433265175 | 1.835845133  |
| H | 4.497568323  | -1.255915092 | -0.115572010 |
| H | 4.519092328  | 1.108917083  | -0.047314002 |
| H | 5.541660398  | 2.285433166  | -1.974855143 |
| H | 4.222155304  | 2.473549179  | -4.136405296 |
| H | 1.946599142  | 1.492241105  | -4.201375302 |
| H | -1.561205114 | -1.893161135 | 4.026054292  |
| H | -2.576020184 | -4.155824301 | 3.977871285  |
| H | -2.388040174 | -5.503875397 | 1.835781134  |
| H | -1.180741087 | -4.524168328 | -0.096061006 |
| H | 1.184051086  | -4.492827324 | -0.025821003 |
| H | 2.334585170  | -5.516046399 | -1.970099142 |
| H | 2.431079175  | -4.230533302 | -4.154800301 |
| H | 1.374669097  | -1.950019141 | -4.215075304 |
| H | -1.860838132 | 1.530897112  | 4.022978290  |
| H | -4.142997299 | 2.550987184  | 4.004093288  |
| H | -5.498989398 | 2.375277170  | 1.867823134  |
| H | -4.530163324 | 1.182268086  | -0.077295005 |
| H | -4.499752323 | -1.174327083 | -0.035258001 |
| H | -5.516769398 | -2.326920170 | -1.980631145 |
| H | -4.219989302 | -2.438687178 | -4.157393301 |

|   |              |              |              |
|---|--------------|--------------|--------------|
| H | -1.934149141 | -1.392830100 | -4.211120302 |
| N | 0.139226010  | 0.034835003  | 4.425304318  |
| N | -0.578739043 | -0.214682013 | 5.357648388  |
| N | -1.265378093 | -0.454698033 | 6.261136448  |
| N | -0.046031002 | -0.140022009 | -4.651500334 |
| N | 0.264425019  | 0.551303039  | -5.586505402 |
| N | 0.562018042  | 1.209361088  | -6.493312469 |

**# DFT (B3PW91) results**

**# 1**

|    |              |              |              |
|----|--------------|--------------|--------------|
| Cr | 0.000000000  | 0.000000000  | 2.464161000  |
| Cr | 0.000000000  | 0.000000000  | 0.000000000  |
| Cr | 0.000000000  | 0.000000000  | -2.464161000 |
| N  | 0.736795000  | 2.003540000  | 2.201233000  |
| N  | 0.000000000  | 2.043123000  | 0.000000000  |
| N  | -0.736795000 | 2.003540000  | -2.201233000 |
| N  | 2.003540000  | -0.736795000 | 2.201233000  |
| N  | 2.043123000  | 0.000000000  | 0.000000000  |
| N  | 2.003540000  | 0.736795000  | -2.201233000 |
| N  | -0.736795000 | -2.003540000 | 2.201233000  |
| N  | 0.000000000  | -2.043123000 | 0.000000000  |
| N  | 0.736795000  | -2.003540000 | -2.201233000 |
| N  | -2.003540000 | 0.736795000  | 2.201233000  |
| N  | -2.043123000 | 0.000000000  | 0.000000000  |
| N  | -2.003540000 | -0.736795000 | -2.201233000 |
| C  | 1.396289000  | 2.562966000  | 3.237276000  |
| C  | 1.974747000  | 3.819717000  | 3.189531000  |
| C  | 1.892190000  | 4.529312000  | 1.985606000  |
| C  | 1.227098000  | 3.972094000  | 0.910005000  |
| C  | 0.624930000  | 2.694861000  | 1.028523000  |
| C  | -0.624930000 | 2.694861000  | -1.028523000 |
| C  | -1.227098000 | 3.972094000  | -0.910005000 |
| C  | -1.892190000 | 4.529312000  | -1.985606000 |
| C  | -1.974747000 | 3.819717000  | -3.189531000 |
| C  | -1.396289000 | 2.562966000  | -3.237276000 |
| C  | 2.562966000  | -1.396289000 | 3.237276000  |
| C  | 3.819717000  | -1.974747000 | 3.189531000  |

|   |              |              |              |
|---|--------------|--------------|--------------|
| C | 4.529312000  | -1.892190000 | 1.985606000  |
| C | 3.972094000  | -1.227098000 | 0.910005000  |
| C | 2.694861000  | -0.624930000 | 1.028523000  |
| C | 2.694861000  | 0.624930000  | -1.028523000 |
| C | 3.972094000  | 1.227098000  | -0.910005000 |
| C | 4.529312000  | 1.892190000  | -1.985606000 |
| C | 3.819717000  | 1.974747000  | -3.189531000 |
| C | 2.562966000  | 1.396289000  | -3.237276000 |
| C | -1.396289000 | -2.562966000 | 3.237276000  |
| C | -1.974747000 | -3.819717000 | 3.189531000  |
| C | -1.892190000 | -4.529312000 | 1.985606000  |
| C | -1.227098000 | -3.972094000 | 0.910005000  |
| C | -0.624930000 | -2.694861000 | 1.028523000  |
| C | 0.624930000  | -2.694861000 | -1.028523000 |
| C | 1.227098000  | -3.972094000 | -0.910005000 |
| C | 1.892190000  | -4.529312000 | -1.985606000 |
| C | 1.974747000  | -3.819717000 | -3.189531000 |
| C | 1.396289000  | -2.562966000 | -3.237276000 |
| C | -2.562966000 | 1.396289000  | 3.237276000  |
| C | -3.819717000 | 1.974747000  | 3.189531000  |
| C | -4.529312000 | 1.892190000  | 1.985606000  |
| C | -3.972094000 | 1.227098000  | 0.910005000  |
| C | -2.694861000 | 0.624930000  | 1.028523000  |
| C | -2.694861000 | -0.624930000 | -1.028523000 |
| C | -3.972094000 | -1.227098000 | -0.910005000 |
| C | -4.529312000 | -1.892190000 | -1.985606000 |
| C | -3.819717000 | -1.974747000 | -3.189531000 |
| C | -2.562966000 | -1.396289000 | -3.237276000 |
| H | 1.425579000  | 1.950701000  | 4.142233000  |
| H | 2.483949000  | 4.220964000  | 4.065651000  |
| H | 2.364686000  | 5.509513000  | 1.882744000  |
| H | 1.192638000  | 4.487863000  | -0.049045000 |
| H | -1.192638000 | 4.487863000  | 0.049045000  |
| H | -2.364686000 | 5.509513000  | -1.882744000 |
| H | -2.483949000 | 4.220964000  | -4.065651000 |
| H | -1.425579000 | 1.950701000  | -4.142233000 |

|     |              |              |              |
|-----|--------------|--------------|--------------|
| H   | 1.950701000  | -1.425579000 | 4.142233000  |
| H   | 4.220964000  | -2.483949000 | 4.065651000  |
| H   | 5.509513000  | -2.364686000 | 1.882744000  |
| H   | 4.487863000  | -1.192638000 | -0.049045000 |
| H   | 4.487863000  | 1.192638000  | 0.049045000  |
| H   | 5.509513000  | 2.364686000  | -1.882744000 |
| H   | 4.220964000  | 2.483949000  | -4.065651000 |
| H   | 1.950701000  | 1.425579000  | -4.142233000 |
| H   | -1.425579000 | -1.950701000 | 4.142233000  |
| H   | -2.483949000 | -4.220964000 | 4.065651000  |
| H   | -2.364686000 | -5.509513000 | 1.882744000  |
| H   | -1.192638000 | -4.487863000 | -0.049045000 |
| H   | 1.192638000  | -4.487863000 | 0.049045000  |
| H   | 2.364686000  | -5.509513000 | -1.882744000 |
| H   | 2.483949000  | -4.220964000 | -4.065651000 |
| H   | 1.425579000  | -1.950701000 | -4.142233000 |
| H   | -1.950701000 | 1.425579000  | 4.142233000  |
| H   | -4.220964000 | 2.483949000  | 4.065651000  |
| H   | -5.509513000 | 2.364686000  | 1.882744000  |
| H   | -4.487863000 | 1.192638000  | -0.049045000 |
| H   | -4.487863000 | -1.192638000 | 0.049045000  |
| H   | -5.509513000 | -2.364686000 | -1.882744000 |
| H   | -4.220964000 | -2.483949000 | -4.065651000 |
| H   | -1.950701000 | -1.425579000 | -4.142233000 |
| Cl  | 0.000000000  | 0.000000000  | 4.965980000  |
| Cl  | 0.000000000  | 0.000000000  | -4.965980000 |
| #   |              |              |              |
| # 2 |              |              |              |
| Cr  | 0.000000000  | -2.461436000 | -0.012535000 |
| Cr  | 0.000000000  | 0.000000000  | -0.021801000 |
| Cr  | 0.000000000  | 2.461436000  | -0.012535000 |
| N   | 1.926416000  | -2.204474000 | 0.894368000  |
| N   | 1.452275000  | 0.005144000  | 1.423829000  |
| N   | 0.896334000  | 2.204082000  | 1.910408000  |
| N   | 0.913794000  | -2.204305000 | -1.942135000 |
| N   | 1.441647000  | 0.005875000  | -1.471428000 |

|   |              |              |              |
|---|--------------|--------------|--------------|
| N | 1.934993000  | 2.202512000  | -0.910641000 |
| N | -1.934993000 | -2.202512000 | -0.910641000 |
| N | -1.441647000 | -0.005875000 | -1.471428000 |
| N | -0.913794000 | 2.204305000  | -1.942135000 |
| N | -0.896334000 | -2.204082000 | 1.910408000  |
| N | -1.452275000 | -0.005144000 | 1.423829000  |
| N | -1.926416000 | 2.204474000  | 0.894368000  |
| C | 2.772865000  | -3.253527000 | 0.839443000  |
| C | 4.071161000  | -3.215841000 | 1.318553000  |
| C | 4.530362000  | -2.008201000 | 1.858041000  |
| C | 3.679580000  | -0.920648000 | 1.920674000  |
| C | 2.348128000  | -1.030091000 | 1.448643000  |
| C | 1.476919000  | 1.037057000  | 2.320585000  |
| C | 1.968510000  | 0.933370000  | 3.646221000  |
| C | 1.891984000  | 2.014338000  | 4.503372000  |
| C | 1.314883000  | 3.210967000  | 4.060102000  |
| C | 0.821239000  | 3.242355000  | 2.768095000  |
| C | 0.864859000  | -3.254702000 | -2.786809000 |
| C | 1.341869000  | -3.217952000 | -4.085867000 |
| C | 1.875436000  | -2.008944000 | -4.548089000 |
| C | 1.935549000  | -0.920270000 | -3.698564000 |
| C | 1.465662000  | -1.029817000 | -2.366384000 |
| C | 2.341548000  | 1.035037000  | -1.493300000 |
| C | 3.666035000  | 0.923871000  | -1.986284000 |
| C | 4.529565000  | 1.999397000  | -1.909929000 |
| C | 4.091593000  | 3.197008000  | -1.331748000 |
| C | 2.799776000  | 3.235674000  | -0.837278000 |
| C | -2.799776000 | -3.235674000 | -0.837278000 |
| C | -4.091593000 | -3.197008000 | -1.331748000 |
| C | -4.529565000 | -1.999397000 | -1.909929000 |
| C | -3.666035000 | -0.923871000 | -1.986284000 |
| C | -2.341548000 | -1.035037000 | -1.493300000 |
| C | -1.465662000 | 1.029817000  | -2.366384000 |
| C | -1.935549000 | 0.920270000  | -3.698564000 |
| C | -1.875436000 | 2.008944000  | -4.548089000 |
| C | -1.341869000 | 3.217952000  | -4.085867000 |

|   |              |              |              |
|---|--------------|--------------|--------------|
| C | -0.864859000 | 3.254702000  | -2.786809000 |
| C | -0.821239000 | -3.242355000 | 2.768095000  |
| C | -1.314883000 | -3.210967000 | 4.060102000  |
| C | -1.891984000 | -2.014338000 | 4.503372000  |
| C | -1.968510000 | -0.933370000 | 3.646221000  |
| C | -1.476919000 | -1.037057000 | 2.320585000  |
| C | -2.348128000 | 1.030091000  | 1.448643000  |
| C | -3.679580000 | 0.920648000  | 1.920674000  |
| C | -4.530362000 | 2.008201000  | 1.858041000  |
| C | -4.071161000 | 3.215841000  | 1.318553000  |
| C | -2.772865000 | 3.253527000  | 0.839443000  |
| H | 2.344115000  | -4.156457000 | 0.396015000  |
| H | 4.704744000  | -4.100479000 | 1.255853000  |
| H | 5.559564000  | -1.912496000 | 2.213110000  |
| H | 4.032757000  | 0.039262000  | 2.296157000  |
| H | 2.368488000  | -0.019639000 | 3.990785000  |
| H | 2.262946000  | 1.921746000  | 5.527164000  |
| H | 1.235832000  | 4.089991000  | 4.699175000  |
| H | 0.335780000  | 4.134943000  | 2.368849000  |
| H | 0.431540000  | -4.159760000 | -2.353595000 |
| H | 1.283099000  | -4.104641000 | -4.716926000 |
| H | 2.228795000  | -1.913486000 | -5.577916000 |
| H | 2.308305000  | 0.040376000  | -4.052634000 |
| H | 4.004053000  | -0.031138000 | -2.386995000 |
| H | 5.552909000  | 1.901510000  | -2.280788000 |
| H | 4.734082000  | 4.073154000  | -1.249030000 |
| H | 2.423382000  | 4.139565000  | -0.356673000 |
| H | -2.423382000 | -4.139565000 | -0.356673000 |
| H | -4.734082000 | -4.073154000 | -1.249030000 |
| H | -5.552909000 | -1.901510000 | -2.280788000 |
| H | -4.004053000 | 0.031138000  | -2.386995000 |
| H | -2.308305000 | -0.040376000 | -4.052634000 |
| H | -2.228795000 | 1.913486000  | -5.577916000 |
| H | -1.283099000 | 4.104641000  | -4.716926000 |
| H | -0.431540000 | 4.159760000  | -2.353595000 |
| H | -0.335780000 | -4.134943000 | 2.368849000  |

|   |              |              |              |
|---|--------------|--------------|--------------|
| H | -1.235832000 | -4.089991000 | 4.699175000  |
| H | -2.262946000 | -1.921746000 | 5.527164000  |
| H | -2.368488000 | 0.019639000  | 3.990785000  |
| H | -4.032757000 | -0.039262000 | 2.296157000  |
| H | -5.559564000 | 1.912496000  | 2.213110000  |
| H | -4.704744000 | 4.100479000  | 1.255853000  |
| H | -2.344115000 | 4.156457000  | 0.396015000  |
| N | 0.126826000  | -4.594533000 | -0.079066000 |
| N | -0.578519000 | -5.535602000 | 0.177253000  |
| N | -1.250457000 | -6.448417000 | 0.419274000  |
| N | -0.126826000 | 4.594533000  | -0.079066000 |
| N | 0.578519000  | 5.535602000  | 0.177253000  |
| N | 1.250457000  | 6.448417000  | 0.419274000  |

**# DFT (M06L) results**

**# 1**

|    |              |              |              |
|----|--------------|--------------|--------------|
| Cr | 0.000000000  | 0.000000000  | -0.000004000 |
| Cr | 0.000000000  | 0.000000000  | 2.364586000  |
| Cr | 0.000000000  | 0.000000000  | -2.364594000 |
| N  | 0.000000000  | 2.034925000  | -0.000004000 |
| N  | 2.034925000  | 0.000000000  | -0.000004000 |
| N  | 0.000000000  | -2.034925000 | -0.000004000 |
| N  | -2.034925000 | 0.000000000  | -0.000004000 |
| N  | 0.869604000  | 1.943131000  | 2.134100000  |
| N  | 1.943131000  | -0.869604000 | 2.134100000  |
| N  | -0.869604000 | -1.943131000 | 2.134100000  |
| N  | -1.943131000 | 0.869604000  | 2.134100000  |
| N  | -0.869607000 | 1.943129000  | -2.134103000 |
| N  | 1.943129000  | 0.869607000  | -2.134103000 |
| N  | 0.869607000  | -1.943129000 | -2.134103000 |
| N  | -1.943129000 | -0.869607000 | -2.134103000 |
| C  | 1.656563000  | 2.441928000  | 3.110209000  |
| C  | 0.689958000  | 2.673006000  | 0.989607000  |
| C  | 2.284787000  | 3.673249000  | 3.028405000  |
| C  | 1.305873000  | 3.936541000  | 0.848764000  |
| C  | 2.100940000  | 4.429810000  | 1.865155000  |
| C  | -1.656562000 | 2.441928000  | -3.110213000 |



|   |              |              |              |
|---|--------------|--------------|--------------|
| C | -0.689958000 | 2.673004000  | -0.989611000 |
| C | -2.284803000 | 3.673240000  | -3.028394000 |
| C | -1.305889000 | 3.936531000  | -0.848765000 |
| C | -2.100962000 | 4.429794000  | -1.865139000 |
| C | 2.441928000  | -1.656563000 | 3.110209000  |
| C | 2.673006000  | -0.689958000 | 0.989607000  |
| C | 3.673249000  | -2.284787000 | 3.028405000  |
| C | 3.936541000  | -1.305873000 | 0.848764000  |
| C | 4.429810000  | -2.100940000 | 1.865155000  |
| C | 2.441928000  | 1.656562000  | -3.110213000 |
| C | 2.673004000  | 0.689958000  | -0.989611000 |
| C | 3.673240000  | 2.284803000  | -3.028394000 |
| C | 3.936531000  | 1.305889000  | -0.848765000 |
| C | 4.429794000  | 2.100962000  | -1.865139000 |
| C | -1.656563000 | -2.441928000 | 3.110209000  |
| C | -0.689958000 | -2.673006000 | 0.989607000  |
| C | -2.284787000 | -3.673249000 | 3.028405000  |
| C | -1.305873000 | -3.936541000 | 0.848764000  |
| C | -2.100940000 | -4.429810000 | 1.865155000  |
| C | 1.656562000  | -2.441928000 | -3.110213000 |
| C | 0.689958000  | -2.673004000 | -0.989611000 |
| C | 2.284803000  | -3.673240000 | -3.028394000 |
| C | 1.305889000  | -3.936531000 | -0.848765000 |
| C | 2.100962000  | -4.429794000 | -1.865139000 |
| C | -2.441928000 | 1.656563000  | 3.110209000  |
| C | -2.673006000 | 0.689958000  | 0.989607000  |
| C | -3.673249000 | 2.284787000  | 3.028405000  |
| C | -3.936541000 | 1.305873000  | 0.848764000  |
| C | -4.429810000 | 2.100940000  | 1.865155000  |
| C | -2.441928000 | -1.656562000 | -3.110213000 |
| C | -2.673004000 | -0.689958000 | -0.989611000 |
| C | -3.673240000 | -2.284803000 | -3.028394000 |
| C | -3.936531000 | -1.305889000 | -0.848765000 |
| C | -4.429794000 | -2.100962000 | -1.865139000 |
| H | 1.748502000  | 1.802782000  | 3.992468000  |
| H | 2.905139000  | 4.024656000  | 3.851905000  |

|     |              |              |              |
|-----|--------------|--------------|--------------|
| H   | 2.598871000  | 5.394798000  | 1.745978000  |
| H   | 1.192936000  | 4.478675000  | -0.090967000 |
| H   | -1.748493000 | 1.802789000  | -3.992477000 |
| H   | -2.905161000 | 4.024648000  | -3.851888000 |
| H   | -2.598903000 | 5.394775000  | -1.745951000 |
| H   | -1.192954000 | 4.478660000  | 0.090967000  |
| H   | 1.802782000  | -1.748502000 | 3.992468000  |
| H   | 4.024656000  | -2.905139000 | 3.851905000  |
| H   | 5.394798000  | -2.598871000 | 1.745978000  |
| H   | 4.478675000  | -1.192936000 | -0.090967000 |
| H   | 1.802789000  | 1.748493000  | -3.992477000 |
| H   | 4.024648000  | 2.905161000  | -3.851888000 |
| H   | 5.394775000  | 2.598903000  | -1.745951000 |
| H   | 4.478660000  | 1.192954000  | 0.090967000  |
| H   | -1.748502000 | -1.802782000 | 3.992468000  |
| H   | -2.905139000 | -4.024656000 | 3.851905000  |
| H   | -2.598871000 | -5.394798000 | 1.745978000  |
| H   | -1.192936000 | -4.478675000 | -0.090967000 |
| H   | 1.748493000  | -1.802789000 | -3.992477000 |
| H   | 2.905161000  | -4.024648000 | -3.851888000 |
| H   | 2.598903000  | -5.394775000 | -1.745951000 |
| H   | 1.192954000  | -4.478660000 | 0.090967000  |
| H   | -1.802782000 | 1.748502000  | 3.992468000  |
| H   | -4.024656000 | 2.905139000  | 3.851905000  |
| H   | -5.394798000 | 2.598871000  | 1.745978000  |
| H   | -4.478675000 | 1.192936000  | -0.090967000 |
| H   | -1.802789000 | -1.748493000 | -3.992477000 |
| H   | -4.024648000 | -2.905161000 | -3.851888000 |
| H   | -5.394775000 | -2.598903000 | -1.745951000 |
| H   | -4.478660000 | -1.192954000 | 0.090967000  |
| Cl  | 0.000000000  | 0.000000000  | 4.823698000  |
| Cl  | 0.000000000  | 0.000000000  | -4.823703000 |
| #   |              |              |              |
| # 2 |              |              |              |
| Cr  | 0.000000000  | -2.383710000 | -0.024672000 |
| Cr  | 0.000000000  | 0.000000000  | -0.017913000 |

|    |              |              |              |
|----|--------------|--------------|--------------|
| Cr | 0.000000000  | 2.383710000  | -0.024672000 |
| N  | 1.978340000  | -2.138780000 | 0.747062000  |
| N  | 1.454909000  | 0.011238000  | 1.407533000  |
| N  | 0.786456000  | 2.155219000  | 1.943449000  |
| N  | 0.779769000  | -2.148087000 | -1.998819000 |
| N  | 1.432578000  | 0.003462000  | -1.471506000 |
| N  | 1.981975000  | 2.141445000  | -0.795892000 |
| N  | -1.981975000 | -2.141445000 | -0.795892000 |
| N  | -1.432578000 | -0.003462000 | -1.471506000 |
| N  | -0.779769000 | 2.148087000  | -1.998819000 |
| N  | -0.786456000 | -2.155219000 | 1.943449000  |
| N  | -1.454909000 | -0.011238000 | 1.407533000  |
| N  | -1.978340000 | 2.138780000  | 0.747062000  |
| C  | 2.871007000  | -3.130615000 | 0.550075000  |
| C  | 4.196324000  | -3.053768000 | 0.942337000  |
| C  | 4.630681000  | -1.873542000 | 1.557394000  |
| C  | 3.735499000  | -0.841896000 | 1.766612000  |
| C  | 2.390586000  | -0.982642000 | 1.356439000  |
| C  | 1.459489000  | 1.022873000  | 2.324398000  |
| C  | 1.987789000  | 0.922029000  | 3.630872000  |
| C  | 1.816068000  | 1.960744000  | 4.525584000  |
| C  | 1.114339000  | 3.106115000  | 4.131859000  |
| C  | 0.616477000  | 3.147423000  | 2.841739000  |
| C  | 0.600706000  | -3.143482000 | -2.891069000 |
| C  | 1.022305000  | -3.073099000 | -4.207702000 |
| C  | 1.650250000  | -1.896368000 | -4.633248000 |
| C  | 1.841066000  | -0.861053000 | -3.738286000 |
| C  | 1.399647000  | -0.994812000 | -2.402702000 |
| C  | 2.365845000  | 0.999341000  | -1.449643000 |
| C  | 3.687668000  | 0.869653000  | -1.932363000 |
| C  | 4.594925000  | 1.893043000  | -1.738429000 |
| C  | 4.196172000  | 3.051627000  | -1.061387000 |
| C  | 2.890891000  | 3.120551000  | -0.606081000 |
| C  | -2.890891000 | -3.120551000 | -0.606081000 |
| C  | -4.196172000 | -3.051627000 | -1.061387000 |
| C  | -4.594925000 | -1.893043000 | -1.738429000 |

|   |              |              |              |
|---|--------------|--------------|--------------|
| C | -3.687668000 | -0.869653000 | -1.932363000 |
| C | -2.365845000 | -0.999341000 | -1.449643000 |
| C | -1.399647000 | 0.994812000  | -2.402702000 |
| C | -1.841066000 | 0.861053000  | -3.738286000 |
| C | -1.650250000 | 1.896368000  | -4.633248000 |
| C | -1.022305000 | 3.073099000  | -4.207702000 |
| C | -0.600706000 | 3.143482000  | -2.891069000 |
| C | -0.616477000 | -3.147423000 | 2.841739000  |
| C | -1.114339000 | -3.106115000 | 4.131859000  |
| C | -1.816068000 | -1.960744000 | 4.525584000  |
| C | -1.987789000 | -0.922029000 | 3.630872000  |
| C | -1.459489000 | -1.022873000 | 2.324398000  |
| C | -2.390586000 | 0.982642000  | 1.356439000  |
| C | -3.735499000 | 0.841896000  | 1.766612000  |
| C | -4.630681000 | 1.873542000  | 1.557394000  |
| C | -4.196324000 | 3.053768000  | 0.942337000  |
| C | -2.871007000 | 3.130615000  | 0.550075000  |
| H | 2.461587000  | -4.019133000 | 0.061082000  |
| H | 4.870490000  | -3.889920000 | 0.761178000  |
| H | 5.675526000  | -1.754233000 | 1.853010000  |
| H | 4.062821000  | 0.107734000  | 2.191619000  |
| H | 2.480825000  | -0.003056000 | 3.931680000  |
| H | 2.206819000  | 1.872385000  | 5.541723000  |
| H | 0.953103000  | 3.945063000  | 4.807003000  |
| H | 0.048687000  | 4.008390000  | 2.481374000  |
| H | 0.104083000  | -4.030041000 | -2.486951000 |
| H | 0.854709000  | -3.911906000 | -4.882090000 |
| H | 1.970243000  | -1.782895000 | -5.671563000 |
| H | 2.275555000  | 0.086656000  | -4.058926000 |
| H | 3.988317000  | -0.068848000 | -2.399991000 |
| H | 5.623171000  | 1.782250000  | -2.090149000 |
| H | 4.880516000  | 3.879001000  | -0.879771000 |
| H | 2.540734000  | 3.998773000  | -0.058070000 |
| H | -2.540734000 | -3.998773000 | -0.058070000 |
| H | -4.880516000 | -3.879001000 | -0.879771000 |
| H | -5.623171000 | -1.782250000 | -2.090149000 |

|   |              |              |              |
|---|--------------|--------------|--------------|
| H | -3.988317000 | 0.068848000  | -2.399991000 |
| H | -2.275555000 | -0.086656000 | -4.058926000 |
| H | -1.970243000 | 1.782895000  | -5.671563000 |
| H | -0.854709000 | 3.911906000  | -4.882090000 |
| H | -0.104083000 | 4.030041000  | -2.486951000 |
| H | -0.048687000 | -4.008390000 | 2.481374000  |
| H | -0.953103000 | -3.945063000 | 4.807003000  |
| H | -2.206819000 | -1.872385000 | 5.541723000  |
| H | -2.480825000 | 0.003056000  | 3.931680000  |
| H | -4.062821000 | -0.107734000 | 2.191619000  |
| H | -5.675526000 | 1.754233000  | 1.853010000  |
| H | -4.870490000 | 3.889920000  | 0.761178000  |
| H | -2.461587000 | 4.019133000  | 0.061082000  |
| N | 0.090929000  | -4.497796000 | -0.086477000 |
| N | -0.632621000 | -5.309278000 | 0.438299000  |
| N | -1.333288000 | -6.093286000 | 0.945999000  |
| N | -0.090929000 | 4.497796000  | -0.086477000 |
| N | 0.632621000  | 5.309278000  | 0.438299000  |
| N | 1.333288000  | 6.093286000  | 0.945999000  |
